# Supplementary material
Source: ML conference proceedings conference paper supplement (https://proceedings.neurips.cc/paper_files/paper/2007/hash/d296c101daa88a51f6ca8cfc1ac79b50-Abstract.html)
Supplement: Supplementary file [file d296c101daa88a51f6ca8cfc1ac79b50-Supplemental.zip]

# NEAR-MAXIMUM ENTROPY MODELS FOR BINARY NEURAL REPRESENTATIONS OF NATURAL IMAGES

MATTHIAS BETHGE AND PHILIPP BERENS (W46)

What is the influence of pairwise correlations on large networks of neurons?

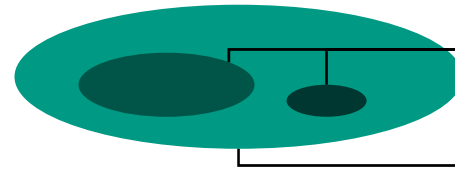

Low dimensional observations:  
often well described with  
pairwise statistics

Full system: ?

## Near-MaxEnt Model

Dichotomized  
Gaussian distribution:

$$\mathbf{z} \sim \mathcal{N}(\gamma, \Lambda)$$

$$s_i = \text{sgn}(z_i)$$

Parameter estimation  
and sampling are easy.

$$\gamma_i = \Phi^{-1} \left( \frac{\mu_i + 1}{2} \right)$$

$$\Sigma_{ij} - 4\Psi(\gamma_i, \gamma_j, \Lambda_{ij}) = 0$$

Model has entropy  
close to the maximum.

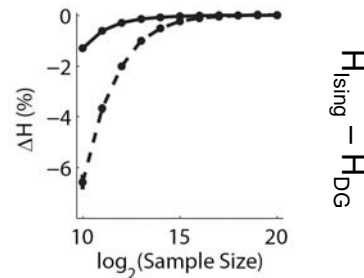

## Binarized Natural Images

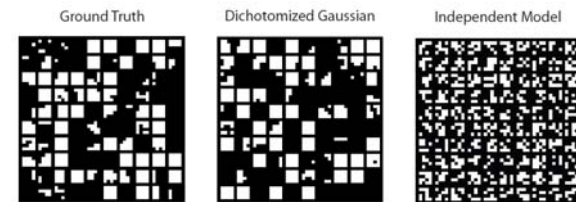

Small network:  
Pairwise correlations  
sufficient

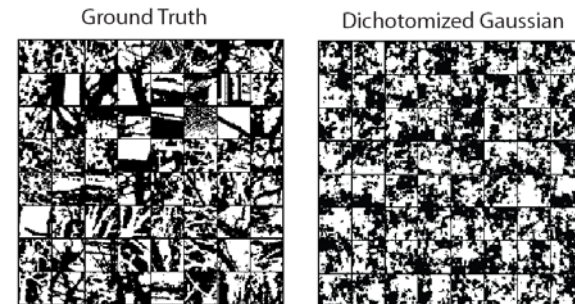

Large network:  
Pairwise correlations fail
